# Supplementary material
Source: publisher figshare collection journal article supplement (https://acs.figshare.com/ndownloader/files/4374943)
Supplement: Supplementary file 1 [file 4374943]

**Supporting Information (Manuscript ID: jf-2010-03497p)****Table 1.** Effects of the purified Chinese sweet leaf tea extract (GER) on the hematology test of diet-induced obese rats.

|                                                  | Groups                    |                           |                           |
|--------------------------------------------------|---------------------------|---------------------------|---------------------------|
|                                                  | HFD                       | LFD                       | HFD + GER                 |
| <b>Erythrocyte</b><br><b>(10<sup>6</sup>/μl)</b> | 8.09 ± 0.11 <sup>¥</sup>  | 8.03 ± 0.14               | 8.16 ± 0.16               |
| <b>Hemoglobin</b><br><b>(g/dL)</b>               | 14.89 ± 0.34 <sup>¥</sup> | 14.37 ± 0.30              | 14.13 ± 0.34              |
| <b>Hematocrit</b><br><b>(%)</b>                  | 42.06 ± 0.46 <sup>¥</sup> | 41.69 ± 0.93              | 41.62 ± 0.84              |
| <b>RDW</b><br><b>(%)</b>                         | 11.93 ± 0.03 <sup>¥</sup> | 11.89 ± 0.08 <sup>¥</sup> | 11.90 ± 0.08 <sup>¥</sup> |
| <b>MCV</b><br><b>(fL)</b>                        | 52.60 ± 0.54              | 52.64 ± 0.46              | 52.45 ± 0.58              |
| <b>MCH</b><br><b>(pg)</b>                        | 18.04 ± 0.44              | 17.96 ± 0.44              | 16.97 ± 0.58              |
| <b>MCHC</b><br><b>(g/dL)</b>                     | 34.66 ± 0.26              | 34.51 ± 0.20 <sup>¥</sup> | 34.59 ± 0.22 <sup>†</sup> |
| <b>Platelets</b><br><b>(10<sup>3</sup>/μl)</b>   | 573.70 ± 96.80            | 582.20 ± 74.25            | 617.40 ± 94.05            |
| <b>MPV</b><br><b>(fL)</b>                        | 7.07 ± 0.41 <sup>¥</sup>  | 7.28 ± 0.50               | 7.53 ± 0.54               |
| <b>Total WBC</b><br><b>(10<sup>3</sup>/μl)</b>   | 3.55 ± 0.32               | 3.73 ± 0.35 <sup>¥</sup>  | 4.08 ± 0.32               |

All values were expressed as mean ± standard error where n=10, unless otherwise specified. Different letters on each row indicated a significant difference at  $p \leq 0.05$ . <sup>†</sup>n=8; <sup>¥</sup>n=9. HFD, High fat diet control group; LFD, Low fat diet control group; HFD + GER, High-fat diet group treated with purified Chinese sweet leaf tea.

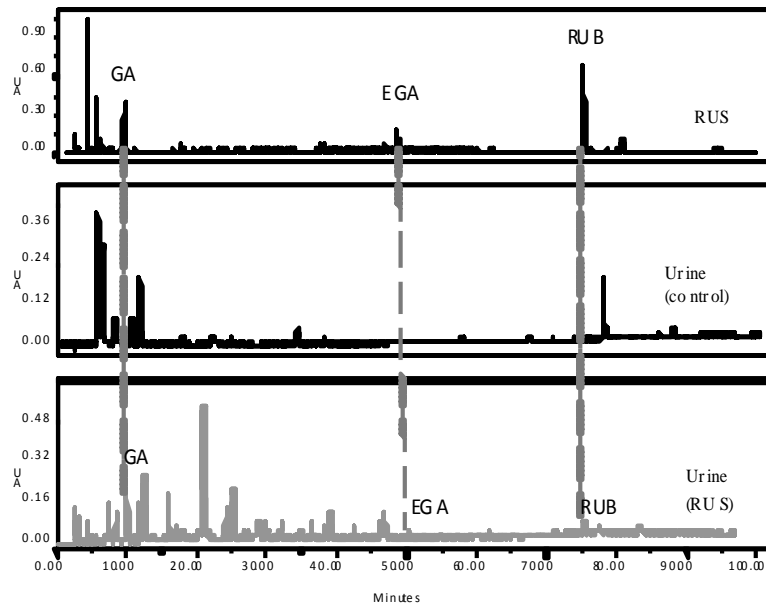

**Figure 1.** Chromatographic fingerprints of the standardized Chinese sweet leaf tea (*Rubus suavissimus*) extract (RUS), the control (blank diet), and RUS-treated urine samples indicating the presence of the three major marker compounds, gallic acid (GA), ellagic acid (EGA), and rubusoside (RUB) obtained from the normal SD rats after a single oral administration of 1 g/kg via oral gavage.

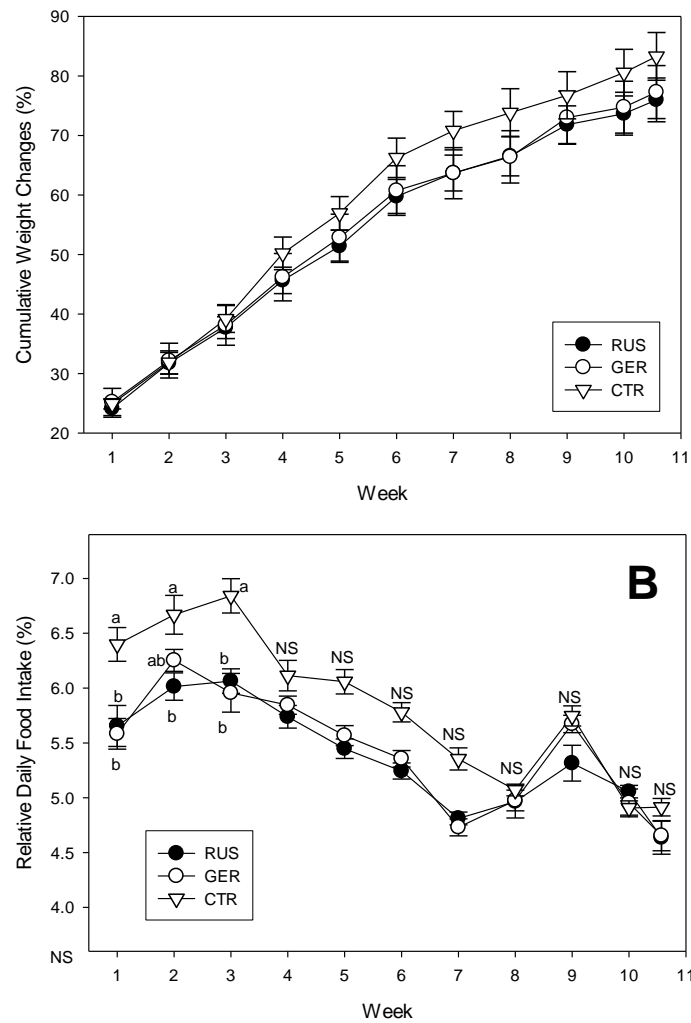

**Figure 2. A:** Effects of the standardized (RUS) and the purified (GER) Chinese sweet leaf tea (*Rubus suavissimus*) extract on the body weight gain (%) in male SD rats fed with normal diet for 10 weeks. **B:** Effects of RUS and GER on the relative daily food intake (%) in male SD rats fed with normal diet for 10 weeks. Different letters at each week indicate a significant difference at  $p \leq 0.05$ . NS represents no significant differences. (n=8 for RUS and GER group; n=9 for CTR group). CTR, vehicle control.

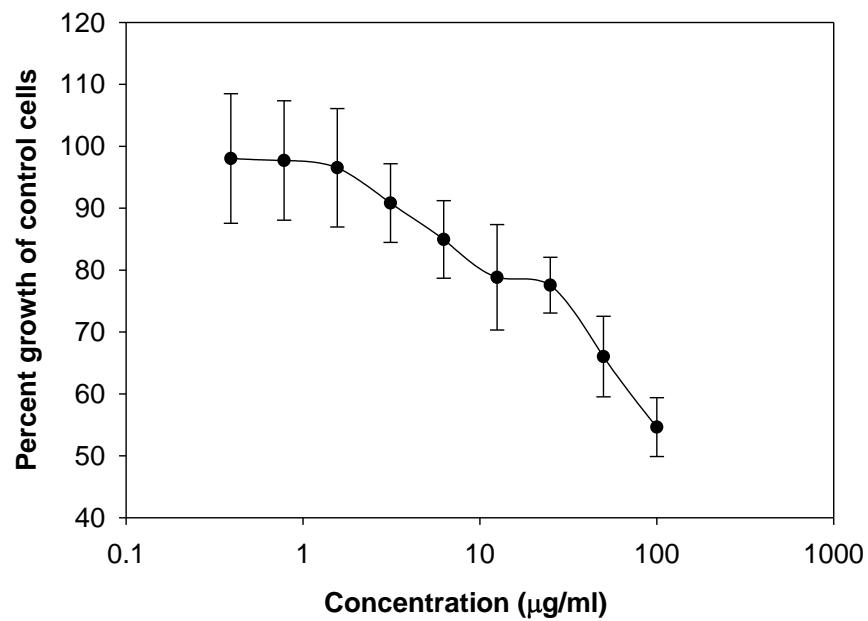

**Figure 3.** Effect of the purified Chinese sweet leaf tea (GER) on proliferation of 3T3-L1 pre-adipocytes.
